# Supplementary material for: The impact of nurse staffing levels on nursing-sensitive patient outcomes: a multilevel regression approach
Source: PubMed Central journal article supplement (PMC8214586; doi:10.1007/s10198-021-01292-2), 2021-04-19
Supplement: 10198_2021_1292_MOESM1_ESM.pdf [file 10198_2021_1292_MOESM1_ESM.pdf]

---

**A Appendix****Tables**

Table A.1: Sample reduction procedure per hospital unit (2014–2018)

| unit type         | All hospital stays |                             |                  | After combination with quality reports |                             |                  | After final exclusions (final sample) |                             |                  |
|-------------------|--------------------|-----------------------------|------------------|----------------------------------------|-----------------------------|------------------|---------------------------------------|-----------------------------|------------------|
|                   | hospitals          | hospital units <sup>†</sup> | inpatient cases  | hospitals                              | hospital units <sup>†</sup> | inpatient cases  | hospitals                             | hospital units <sup>†</sup> | inpatient cases  |
| internal medicine | 1,152              | 6,403                       | 1,654,139        | 1,003                                  | 4,504                       | 1,338,560        | 745                                   | 3,554                       | 1,258,263        |
| geriatrics        | 309                | 1,608                       | 82,743           | 240                                    | 1,024                       | 62,930           | 36                                    | 176                         | 25,921           |
| cardiology        | 219                | 1,148                       | 334,805          | 176                                    | 786                         | 255,312          | 147                                   | 695                         | 246,484          |
| hematology        | 128                | 650                         | 85,902           | 98                                     | 411                         | 56,188           | 54                                    | 260                         | 46,386           |
| gastroenterology  | 122                | 657                         | 115,653          | 97                                     | 430                         | 80,797           | 65                                    | 318                         | 71,595           |
| pneumology        | 66                 | 325                         | 67,259           | 48                                     | 210                         | 51,416           | 28                                    | 139                         | 46,406           |
| general surgery   | 1,144              | 6,352                       | 1,193,158        | 975                                    | 4,375                       | 931,593          | 683                                   | 3,227                       | 837,653          |
| trauma surgery    | 413                | 2,047                       | 307,020          | 321                                    | 1,375                       | 229,381          | 203                                   | 958                         | 197,160          |
| neurosurgery      | 177                | 980                         | 96,503           | 141                                    | 652                         | 74,399           | 68                                    | 323                         | 55,519           |
| vascular surgery  | 205                | 1,077                       | 70,998           | 161                                    | 686                         | 48,483           | 19                                    | 91                          | 15,993           |
| plastic surgery   | 103                | 515                         | 31,451           | 81                                     | 351                         | 25,891           | 15                                    | 71                          | 12,123           |
| heart surgery     | 74                 | 431                         | 41,323           | 64                                     | 308                         | 34,204           | 28                                    | 137                         | 23,607           |
| urology           | 526                | 2,886                       | 356,445          | 425                                    | 1,887                       | 276,493          | 224                                   | 1,073                       | 234,160          |
| dermatology       | 113                | 638                         | 107,004          | 89                                     | 417                         | 73,456           | 55                                    | 273                         | 63,617           |
| dentistry         | 172                | 838                         | 44,744           | 121                                    | 498                         | 35,673           | 34                                    | 169                         | 24,249           |
| <b>total</b>      | <b>1,358</b>       | <b>26,555</b>               | <b>4,589,147</b> | <b>1,147</b>                           | <b>17,914</b>               | <b>3,574,776</b> | <b>907</b>                            | <b>11,464</b>               | <b>3,159,136</b> |

Table A.2: Overview NSPOs relying on ICD10-codes

| NSPO                    | ICD10-codes                                                                                                                                                                                                                                                                                                                                                                                                                                                                                                  |
|-------------------------|--------------------------------------------------------------------------------------------------------------------------------------------------------------------------------------------------------------------------------------------------------------------------------------------------------------------------------------------------------------------------------------------------------------------------------------------------------------------------------------------------------------|
| (2) respiratory failure | <b>J18.2:</b> hypostatic pneumonia, unspecified organism<br><b>J81:</b> pulmonary edema<br><b>J95.1:</b> acute pulmonary insufficiency following thoracic surgery<br><b>J95.2:</b> acute pulmonary insufficiency following nonthoracic surgery<br><b>J96.0:</b> respiratory failure, unspecified<br><b>J80:</b> acute respiratory distress syndrome                                                                                                                                                          |
| (3) pressure ulcers     | <b>L89:</b> chronic ulcer of skin                                                                                                                                                                                                                                                                                                                                                                                                                                                                            |
| (4) pneumonia           | <b>U69.00:</b> in hospital acquired pneumonia, at least 48h after admission or manifestation $\leq$ 28 days post-discharge (patients $>18$ years)                                                                                                                                                                                                                                                                                                                                                            |
| (5) sepsis              | <b>A40:</b> streptococcal sepsis<br><b>A41:</b> other sepsis<br><b>A49.9:</b> bacterial infection; unspecified site<br><b>R57.2:</b> septic shock<br><b>R65.0:</b> SIRS of non-infectious origin without acute organ dysfunction<br><b>R65.1:</b> SIRS of non-infectious origin with acute organ dysfunction<br><b>R65.2:</b> SIRS of infectious origin without acute organ dysfunction<br><b>R65.3:</b> SIRS of infectious origin with acute organ dysfunction<br><b>R65.9:</b> SIRS, not further specified |

Table A.3: Characteristics of inpatient cases (in percent)

| unit type         | cases            | LoS        | age brackets |             |             |             | sex brackets |             | bed brackets |             |             |             |
|-------------------|------------------|------------|--------------|-------------|-------------|-------------|--------------|-------------|--------------|-------------|-------------|-------------|
|                   |                  |            | #            | mean        | <50         | 50–62       | 63–75        | >75         | f            | m           | 50–299      | 300–499     |
| internal medicine | 1,258,263        | 5.7        | 20.1         | 22.9        | 25.4        | 31.7        | 43.8         | 56.2        | 30.0         | 30.0        | 20.7        | 19.3        |
| geriatrics        | 25,921           | 18.8       | 0.8          | 1.7         | 16.9        | 80.5        | 56.0         | 44.0        | 39.5         | 15.9        | 26.4        | 18.1        |
| cardiology        | 246,484          | 4.8        | 12.5         | 23.7        | 30.3        | 33.5        | 34.2         | 65.8        | 11.7         | 22.6        | 34.2        | 31.5        |
| hematology        | 46,386           | 8.4        | 17.2         | 28.0        | 33.3        | 21.5        | 41.1         | 58.9        | 3.2          | 19.7        | 20.9        | 56.1        |
| gastroenterology  | 71,595           | 5.6        | 24.6         | 23.7        | 24.5        | 27.2        | 45.4         | 54.6        | 4.0          | 18.8        | 36.3        | 40.9        |
| pneumology        | 46,406           | 5.6        | 15.7         | 30.4        | 33.1        | 20.8        | 37.6         | 62.4        | 45.5         | 14.0        | 17.9        | 22.5        |
| general surgery   | 837,653          | 5.6        | 34.6         | 27.4        | 20.9        | 17.1        | 47.3         | 52.7        | 34.2         | 31.3        | 18.7        | 15.8        |
| trauma surgery    | 197,160          | 6.1        | 32.3         | 24.9        | 20.2        | 22.6        | 50.4         | 49.6        | 13.9         | 21.7        | 32.3        | 32.1        |
| neurosurgery      | 55,519           | 8.8        | 29.8         | 30.0        | 22.3        | 17.9        | 48.1         | 51.9        | 2.2          | 17.4        | 18.8        | 61.5        |
| vascular surgery  | 15,993           | 7.6        | 17.0         | 28.9        | 30.9        | 23.3        | 44.9         | 55.1        | 42.7         | 32.4        | 21.6        | 3.3         |
| plastic surgery   | 12,123           | 5.7        | 44.7         | 26.9        | 16.2        | 12.2        | 54.3         | 45.7        | 12.4         | 41.2        | 27.8        | 18.6        |
| heart surgery     | 23,607           | 13.6       | 10.6         | 26.4        | 36.0        | 27.0        | 24.3         | 75.7        | 23.1         | 11.1        | 15.3        | 50.5        |
| urology           | 234,160          | 4.6        | 22.9         | 23.8        | 28.4        | 24.9        | 22.8         | 77.2        | 11.4         | 23.4        | 27.1        | 38.1        |
| dermatology       | 63,617           | 5.0        | 29.3         | 22.4        | 22.7        | 25.5        | 45.8         | 54.2        | 8.3          | 1.8         | 8.4         | 81.4        |
| dentistry         | 24,249           | 4.7        | 41.5         | 20.9        | 18.5        | 19.1        | 44.6         | 55.4        | 7.9          | 12.4        | 18.5        | 61.1        |
| <b>total</b>      | <b>3,159,136</b> | <b>6.0</b> | <b>24.7</b>  | <b>24.5</b> | <b>24.5</b> | <b>26.2</b> | <b>42.9</b>  | <b>57.1</b> | <b>25.5</b>  | <b>27.0</b> | <b>22.5</b> | <b>25.1</b> |

Table A.4: Prevalence rates NSPOs (in percent)

| unit type         | cases<br>(inp.)  | (1)<br>mortality | (2)<br>respiratory<br>failure | (3)<br>pressure<br>ulcers | (4)<br>pneumonia | (5)<br>sepsis | cases<br>(post.) | (6)<br>30-day<br>readm. | (7)<br>7-day<br>readm. |
|-------------------|------------------|------------------|-------------------------------|---------------------------|------------------|---------------|------------------|-------------------------|------------------------|
| internal medicine | 1,258,263        | 2.7              | 7.0                           | 1.7                       | 1.1              | 2.5           | 869,065          | 11.9                    | 3.7                    |
| geriatrics        | 25,921           | 5.0              | 7.1                           | 8.9                       | 4.9              | 3.0           | 9,528            | 14.0                    | 4.6                    |
| cardiology        | 246,484          | 1.6              | 5.7                           | 0.7                       | 0.8              | 1.3           | 174,148          | 10.6                    | 3.1                    |
| hematology        | 46,386           | 5.2              | 4.9                           | 1.9                       | 2.2              | 7.0           | 11,254           | 34.1                    | 11.1                   |
| gastroenterology  | 71,595           | 2.5              | 3.2                           | 1.5                       | 0.9              | 2.6           | 46,483           | 13.9                    | 4.0                    |
| pneumology        | 46,406           | 2.3              | 11.6                          | 1.3                       | 2.1              | 1.4           | 26,607           | 14.0                    | 3.5                    |
| general surgery   | 837,653          | 0.6              | 2.0                           | 0.9                       | 0.6              | 0.8           | 686,004          | 6.4                     | 2.0                    |
| trauma surgery    | 197,160          | 0.5              | 1.4                           | 1.1                       | 0.4              | 0.3           | 167,983          | 5.5                     | 1.9                    |
| neurosurgery      | 55,519           | 2.0              | 4.9                           | 1.0                       | 1.7              | 1.0           | 37,832           | 9.1                     | 2.8                    |
| vascular surgery  | 15,993           | 0.7              | 2.2                           | 1.1                       | 0.5              | 0.6           | 12,331           | 6.2                     | 1.7                    |
| plastic surgery   | 12,123           | 0.3              | 1.0                           | 1.0                       | 0.3              | 0.3           | 10,132           | 5.3                     | 1.0                    |
| heart surgery     | 23,607           | 3.8              | 20.0                          | 2.7                       | 2.6              | 3.1           | 10,099           | 9.2                     | 2.9                    |
| urology           | 234,160          | 0.4              | 0.9                           | 0.6                       | 0.2              | 1.9           | 150,002          | 14.0                    | 3.3                    |
| dermatology       | 63,617           | 0.1              | 0.2                           | 0.4                       | 0.1              | 0.2           | 48,628           | 8.5                     | 1.6                    |
| dentistry         | 24,249           | 0.1              | 1.5                           | 0.3                       | 0.2              | 0.1           | 19,013           | 9.0                     | 2.6                    |
| <b>total</b>      | <b>3,159,136</b> | <b>1.7</b>       | <b>4.5</b>                    | <b>1.3</b>                | <b>0.9</b>       | <b>1.8</b>    | <b>2,279,109</b> | <b>9.8</b>              | <b>2.9</b>             |

Table A.5: Remaining fixed effects of regression analysis (odds ratios)

| effect           | (1)<br>mortality          | (2)<br>respiratory<br>failure | (3)<br>pressure<br>ulcers | (4)<br>pneumonia          | (5)<br>sepsis             | (6)<br>30-day<br>readmissions | (7)<br>7-day<br>readmissions |
|------------------|---------------------------|-------------------------------|---------------------------|---------------------------|---------------------------|-------------------------------|------------------------------|
| PTN              | 1.093<br>(0.671;1.779)    | 0.828<br>(0.498;1.377)        | 1.332***<br>(1.128;1.574) | 1.291<br>(0.916;1.820)    | 1.110<br>(0.706;1.743)    | 1.039<br>(0.804;1.343)        | 1.071<br>(0.834;1.375)       |
| age              | 1.005*<br>(1.000;1.010)   | 1.013***<br>(1.01;1.016)      | 0.993*<br>(0.988;0.998)   | 0.996<br>(0.99;1.002)     | 1.004*<br>(1.000;1.007)   | 1.026***<br>(1.024;1.027)     | 1.008***<br>(1.005;1.01)     |
| age <sup>2</sup> | 1.000***<br>(1.000;1.000) | 1.000<br>(1.000;1.000)        | 1.000***<br>(1.000;1.000) | 1.000***<br>(1.000;1.000) | 1.000<br>(1.000;1.000)    | 1.000***<br>(1.000;1.000)     | 1.000*<br>(1.000;1.000)      |
| gender           | 0.924***<br>(0.907;0.942) | 0.96***<br>(0.948;0.972)      | 0.988<br>(0.967;1.009)    | 0.763***<br>(0.743;0.783) | 0.891***<br>(0.874;0.907) | 0.946***<br>(0.937;0.955)     | 0.965***<br>(0.950;0.980)    |
| bed category 1   | 0.926***<br>(0.901;0.952) | 1.014<br>(0.996;1.032)        | 1.302***<br>(1.263;1.343) | 0.813***<br>(0.783;0.844) | 0.81***<br>(0.788;0.831)  | 0.840***<br>(0.829;0.852)     | 0.884***<br>(0.863;0.905)    |
| bed category 2   | 1.044**<br>(1.017;1.071)  | 1.176***<br>(1.156;1.196)     | 1.172***<br>(1.138;1.207) | 0.86***<br>(0.83;0.89)    | 0.878***<br>(0.857;0.9)   | 0.929***<br>(0.918;0.941)     | 0.962***<br>(0.941;0.984)    |
| bed category 3   | 1.07***<br>(1.043;1.098)  | 1.143***<br>(1.123;1.162)     | 1.104***<br>(1.071;1.138) | 0.922***<br>(0.891;0.954) | 0.896***<br>(0.875;0.919) | 0.967***<br>(0.954;0.980)     | 0.980<br>(0.958;1.003)       |
| year 1 (2014)    | 0.849***<br>(0.825;0.875) | 0.628***<br>(0.616;0.64)      | 0.876***<br>(0.847;0.905) | 0.652***<br>(0.625;0.679) | 0.757***<br>(0.735;0.779) | 1.046***<br>(1.031;1.060)     | 1.051***<br>(1.025;1.077)    |
| year 2 (2015)    | 0.879***<br>(0.855;0.904) | 0.674***<br>(0.662;0.687)     | 0.893***<br>(0.865;0.922) | 0.716***<br>(0.689;0.744) | 0.776***<br>(0.755;0.797) | 1.005<br>(0.991;1.02)         | 1.034**<br>(1.01;1.06)       |
| year 3 (2016)    | 0.802***<br>(0.779;0.824) | 0.71***<br>(0.697;0.723)      | 0.764***<br>(0.74;0.789)  | 0.654***<br>(0.630;0.679) | 0.778***<br>(0.758;0.799) | 0.982*<br>(0.969;0.996)       | 0.993<br>(0.97;1.018)        |
| year 4 (2017)    | 0.890***<br>(0.866;0.915) | 0.850***<br>(0.835;0.865)     | 0.863***<br>(0.836;0.891) | 0.775***<br>(0.747;0.804) | 0.865***<br>(0.842;0.888) | 0.995<br>(0.981;1.009)        | 1.004<br>(0.98;1.029)        |
| PCCL             | 2.600***<br>(2.582;2.619) | 2.699***<br>(2.687;2.710)     | 2.925***<br>(2.900;2.949) | 3.318***<br>(3.282;3.354) | 2.484***<br>(2.468;2.500) | 1.240***<br>(1.236;1.244)     | 1.252***<br>(1.245;1.259)    |
| <b>cases</b>     | <b>3,159,136</b>          | <b>3,159,136</b>              | <b>3,159,136</b>          | <b>3,159,136</b>          | <b>3,159,136</b>          | <b>2,279,109</b>              | <b>2,279,109</b>             |

\* $p < 0.05$ , \*\* $p < 0.01$ , \*\*\* $p < 0.001$

Table A.6: Results of extended statistical model incl. clinical complexity scores (odds ratios)

| unit type                                                                                | clinical compl. | cases     | (1) mort. | (2) resp. failure | (3) press. ulcers | (4) pneum. | (5) sepsis | cases     | (6) 30-day readm. | (7) 7-day readm. |
|------------------------------------------------------------------------------------------|-----------------|-----------|-----------|-------------------|-------------------|------------|------------|-----------|-------------------|------------------|
| <b>fixed effect</b>                                                                      |                 |           |           |                   |                   |            |            |           |                   |                  |
| PTN ( $\alpha_1$ )                                                                       | –               | 3,159,136 | 1.005     | 1.035**           | 1.013             | 1.019**    | 1.001      | 2,279,109 | 0.997             | 0.999            |
| PTN <sup>2</sup> ( $\alpha_2$ )                                                          | –               | 3,159,136 | 1.001     | 0.994***          | 1.000             | 1.000      | 1.001      | 2,279,109 | 1.000             | 0.999            |
| <b>random effect <math>\tilde{u}_{1u}</math> (per hospital unit type <math>u</math>)</b> |                 |           |           |                   |                   |            |            |           |                   |                  |
| internal medicine                                                                        | low             | 690,398   | 1.033*    | 1.010             | 1.016             | 1.012      | 1.035**    | 540,168   | 0.997             | 0.999            |
| internal medicine                                                                        | medium          | 479,741   | 1.008     | 0.998             | 1.024*            | 1.011      | 1.011      | 287,864   | 0.994             | 0.991            |
| internal medicine                                                                        | high            | 88,124    | 1.004     | 1.007             | 1.026*            | 1.014      | 0.999      | 41,033    | 0.995             | 0.990            |
| geriatrics                                                                               | low             | 5,288     | 1.091     | 0.930             | 1.029             | 0.996      | 0.964      | 2,202     | 1.032***          | 1.001            |
| geriatrics                                                                               | medium          | 16,114    | 0.993     | 1.005             | 0.952**           | 0.999      | 1.009      | 5,682     | 0.994             | 1.003            |
| geriatrics                                                                               | high            | 4,519     | 0.946**   | 1.015             | 0.989             | 0.983      | 1.008      | 1,644     | 0.996             | 1.000            |
| cardiology                                                                               | low             | 156,451   | 1.052*    | 1.007             | 1.005             | 1.001      | 1.023      | 118,231   | 1.024***          | 1.005            |
| cardiology                                                                               | medium          | 76,156    | 1.022     | 1.007             | 1.051**           | 1.025      | 0.990      | 48,327    | 1.003             | 1.009            |
| cardiology                                                                               | high            | 13,877    | 0.942***  | 1.001             | 1.016             | 0.999      | 0.924***   | 7,590     | 0.992             | 1.010            |
| hematology                                                                               | low             | 11,912    | 1.078     | 1.025             | 1.031             | 1.003      | 0.990      | 3,255     | 1.013             | 0.997            |
| hematology                                                                               | medium          | 24,699    | 1.087***  | 1.066***          | 1.001             | 1.010      | 0.893***   | 5,430     | 0.96***           | 0.997            |
| hematology                                                                               | high            | 9,775     | 1.161***  | 1.14***           | 1.145***          | 0.995      | 0.937***   | 2,569     | 0.956***          | 1.000            |
| gastroenterology                                                                         | low             | 36,106    | 1.003     | 0.994             | 0.957             | 0.996      | 0.979      | 27,112    | 0.996             | 1.004            |
| gastroenterology                                                                         | medium          | 30,004    | 1.046*    | 1.073***          | 0.994             | 1.007      | 1.022      | 17,027    | 0.995             | 0.996            |
| gastroenterology                                                                         | high            | 5,485     | 0.920***  | 0.954††           | 1.029             | 0.971      | 0.936***   | 2,344     | 1.008             | 1.003            |
| pneumology                                                                               | low             | 21,553    | 0.994     | 0.982             | 1.002             | 0.996      | 1.019      | 15,150    | 0.981*            | 0.998            |
| pneumology                                                                               | medium          | 21,195    | 0.989     | 1.062***          | 1.039             | 1.015      | 1.061*     | 10,071    | 0.999             | 1.002            |
| pneumology                                                                               | high            | 3,658     | 0.971     | 1.063***          | 1.040             | 1.011      | 1.002      | 1,386     | 1.017             | 1.000            |
| general surgery                                                                          | low             | 605,160   | 0.995     | 0.997             | 1.005             | 0.996      | 1.003      | 527,413   | 0.998             | 1.013*           |
| general surgery                                                                          | medium          | 186,731   | 0.988     | 1.000             | 0.999             | 0.983      | 1.007      | 133,082   | 1.026***          | 0.997            |
| general surgery                                                                          | high            | 45,762    | 0.975     | 1.001             | 0.984             | 0.973††    | 0.998      | 25,509    | 1.059***          | 1.01             |
| trauma surgery                                                                           | low             | 149,918   | 0.984     | 0.987             | 1.024             | 0.997      | 1.005      | 133,756   | 1.005             | 1.005            |
| trauma surgery                                                                           | medium          | 40,331    | 0.980     | 0.983             | 0.958**           | 1.005      | 0.995      | 29,968    | 1.02***           | 1.001            |
| trauma surgery                                                                           | high            | 6,911     | 0.946**   | 0.970†            | 0.995             | 0.995      | 0.968      | 4,259     | 1.03***           | 0.996            |
| neurosurgery                                                                             | low             | 35,101    | 0.961     | 0.982             | 0.996             | 1.000      | 1.029      | 25,943    | 1.008             | 0.997            |
| neurosurgery                                                                             | medium          | 15,848    | 1.011     | 1.016             | 1.031             | 1.006      | 1.061**    | 9,407     | 0.999             | 0.989            |
| neurosurgery                                                                             | high            | 4,570     | 1.031     | 1.035**           | 0.986             | 0.994      | 0.982      | 2,482     | 0.922***          | 1.005            |
| vascular surgery                                                                         | low             | 11,039    | 1.013     | 1.013             | 0.981             | 1.001      | 1.013      | 9,257     | 0.992             | 1.003            |
| vascular surgery                                                                         | medium          | 3,939     | 1.027     | 1.01              | 0.973             | 1.001      | 1.011      | 2,577     | 1.011             | 0.999            |
| vascular surgery                                                                         | high            | 1,015     | 0.951     | 0.973             | 1.004             | 1.003      | 0.972      | 497       | 1.048***          | 0.999            |
| plastic surgery                                                                          | low             | 9,648     | 1.001     | 0.998             | 0.999             | 0.999      | 1.002      | 8,480     | 0.989             | 0.999            |
| plastic surgery                                                                          | medium          | 2,043     | 0.970     | 0.918†            | 0.988             | 0.999      | 0.996      | 1,439     | 1.016             | 1.000            |
| plastic surgery                                                                          | high            | 432       | 0.949     | 0.923†            | 0.929*            | 1.008      | 1.005      | 213       | 1.005             | 1.000            |
| heart surgery                                                                            | low             | 4,858     | 0.98      | 0.977             | 0.997             | 1.000      | 1.021      | 2,509     | 1.073***          | 0.999            |
| heart surgery                                                                            | medium          | 10,390    | 1.020     | 1.052***          | 0.957             | 1.007      | 1.072*     | 4,489     | 0.991             | 1.000            |
| heart surgery                                                                            | high            | 8,359     | 0.921***  | 1.009             | 0.950*            | 0.993      | 0.971      | 3,101     | 0.969*            | 1.001            |
| urology                                                                                  | low             | 146,378   | 1.011     | 0.988             | 0.972             | 1.000      | 1.002      | 102,343   | 1.016**           | 0.997            |
| urology                                                                                  | medium          | 78,601    | 0.988     | 1.012             | 0.995             | 0.995      | 0.992      | 43,859    | 0.991             | 0.997            |
| urology                                                                                  | high            | 9,181     | 1.013     | 0.975             | 1.005             | 0.993      | 1.039**    | 3,800     | 1.012             | 0.999            |
| dermatology                                                                              | low             | 47,791    | 1.001     | 1.007             | 1.010             | 1.002      | 0.997      | 38,376    | 0.959***          | 0.996            |
| dermatology                                                                              | medium          | 14,825    | 0.979     | 1.011             | 1.001             | 1.000      | 0.999      | 9,737     | 0.969***          | 0.988            |
| dermatology                                                                              | high            | 1,001     | 1.044     | 1.047             | 0.982             | 1.007      | 1.059      | 515       | 0.996             | 1.000            |
| dentistry                                                                                | low             | 16,399    | 1.008     | 0.984             | 0.999             | 1.000      | 1.010      | 13,720    | 1.019*            | 1.006            |
| dentistry                                                                                | medium          | 6,955     | 0.997     | 1.008             | 0.992             | 0.997      | 0.992      | 4,844     | 0.986             | 1.000            |
| dentistry                                                                                | high            | 895       | 0.963     | 0.983             | 0.969             | 1.003      | 1.024      | 449       | 1.029             | 1.000            |

\* $p < 0.05$ , \*\* $p < 0.01$ , \*\*\* $p < 0.001$ † $p < 0.05$ , †† $p < 0.01$ , ††† $p < 0.001$  (if significance of random effect part  $\tilde{u}_{1u}$  of  $\alpha_{1u}$  goes in opposite direction of fixed effect part  $\alpha_1$  and is therefore canceled out) Significant random slopes (in expected direction) highlighted in gray. Significant random slopes occur when the unit type-specific random effect is significant or when there is a significant fixed effect (highlighted in lightgray), but no significant unit type-specific random effect in the opposite direction. Confidence intervals are given in parentheses.

Figures

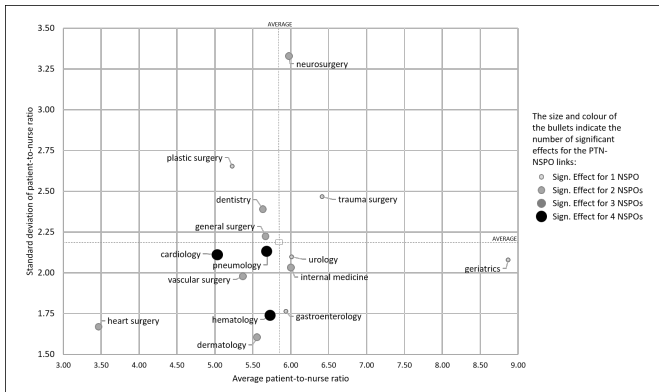

Fig. 2: Effect plot main results
